# Supplementary material for: Stage-specific markers define early steps of procambium development inArabidopsisleaves and correlate termination of vein formation with mesophyll differentiation
Source: Oxford University Press journal article supplement (doi:10.1242/dev.01182), 2004-06-28
Supplement: dev01182-sup-table_s1.pdf [file dev01182-sup-table_s1.pdf]

**Table S1. Origins of marker lines**

| Marker     | Ecotype    | References and sources                                                 |
|------------|------------|------------------------------------------------------------------------|
| ET1335     | <i>Ler</i> | Sundaesan et al., 1995; Cold Spring Harbor Laboratory                  |
| GT5211*    | <i>Ler</i> | Sundaesan et al., 1995; Cold Spring Harbor Laboratory                  |
| 553-643**  | C24        | Goddijn et al., 1993; van den Berg et al., 1995; Mattsson et al., 1999 |
| Athb8-GUS  | Col-0      | Baima et al., 1995                                                     |
| AtP5K1-GUS | C24        | Elge et al., 2001                                                      |
| DR5-GUS    | Col-0      | Ulmasov et al., 1997                                                   |
| ET3845     | <i>Ler</i> | Sundaesan et al., 1995; ABRC stock centre (accession number CS25530)   |
| GT525      | <i>Ler</i> | Sundaesan et al., 1995; ABRC stock centre (accession number CS25632)   |
| GT2845     | <i>Ler</i> | Sundaesan et al., 1995; ABRC stock centre (accession number CS25649)   |
| GT5978     | <i>Ler</i> | Sundaesan et al., 1995; ABRC stock centre (accession number CS25697)   |
| GT6224     | <i>Ler</i> | Sundaesan et al., 1995; ABRC stock centre (accession number CS25725)   |
| GT6644     | <i>Ler</i> | Sundaesan et al., 1995; ABRC stock centre (accession number CS25817)   |

\*Line GT5211 was isolated in a large-scale gene trap insertional mutagenesis (Sundaesan et al., 1995). The insertion is presumed to disrupt the coding sequence of GATA transcription factor 5 (accession number At5g66320) (Jeong and Shih, 2003) (<http://genetrapp.cshl.org/Home.html>), but we have not observed anatomical abnormalities in homozygous individuals.

\*\*Line 553-643 has previously been reported to be expressed in the root vascular cylinder, including the most distal region of the prostele, as well as in the phloem of mature vascular strands (van den Berg et al., 1995; Mattsson et al., 1999).

## References

- Baima, S., Nobili, F., Sessa, G., Lucchetti, S., Ruberti, I. and Morelli, G. (1995). The expression of the *Athb-8* homeobox gene is restricted to provascular cells in *Arabidopsis thaliana*. *Development* **121**, 4171-4182.
- Elge, S., Brearley, C., Xia, H. J., Kehr, J., Xue, H. W. and Müller-Röber, B. (2001). An *Arabidopsis* inositol phospholipid kinase strongly expressed in procambial cells: synthesis of PtdIns(4,5)P<sub>2</sub> and PtdIns(3,4,5)P<sub>3</sub> in insect cells by 5-phosphorylation of precursors. *Plant J.* **26**, 561-571.
- Goddijn, O. J., Lindsey, K., van der Lee, F. M., Klap, J. C. and Sijmons, P. C. (1993). Differential gene expression in nematode-induced feeding structures of transgenic plants harbouring promoter-gusA fusion constructs. *Plant J.* **4**, 863-873.
- Jeong, M. J. and Shih, M. C. (2003). Interaction of a GATA factor with *cis*-acting elements involved in light regulation of nuclear genes encoding chloroplast glyceraldehyde-3-phosphate dehydrogenase in *Arabidopsis*. *Biochem. Biophys. Res. Commun.* **300**, 555-562.
- Mattsson, J., Sung, Z. R. and Berleth, T. (1999). Responses of plant vascular systems to auxin transport inhibition. *Development* **126**, 2979-2991.
- Sundaesan, V., Springer, P., Volpe, T., Haward, S., Jones, J. D., Dean, C., Ma, H. and Martienssen, R. (1995). Patterns of gene action in plant development revealed by enhancer trap and gene trap transposable elements. *Genes Dev.* **9**, 1797-1810.
- Ulmasov, Y., Murfett, J., Hagen, G. and Guilfoyle, T. J. (1997). Aux/IAA proteins repress expression of reporter genes containing natural and highly active synthetic auxin response elements. *Plant Cell* **9**, 1963-1971.
- van den Berg, C., Willemsen, V., Hage, W., Weisbeek, P. and Scheres, B. (1995). Cell fate in the *Arabidopsis* root meristem determined by directional signalling. *Nature* **378**, 62-65.

**Table S2. Leaf development under different growth conditions**

| DAG                | Leaf stage | Leaf shape            | Leaf size<br>( $\times 10^3 \mu\text{m}^2$ ) | Procambial status                                  | Mesophyll differentiation |                    |
|--------------------|------------|-----------------------|----------------------------------------------|----------------------------------------------------|---------------------------|--------------------|
|                    |            |                       |                                              |                                                    | 1 <sup>st</sup> IA        | 2 <sup>nd</sup> IA |
| <b>Condition A</b> |            |                       |                                              |                                                    |                           |                    |
| 2                  | 0 DAI      | semispherical (48/50) | 0.61 $\pm$ 0.01 (13)                         | none (50/50)                                       | na                        | na                 |
| 3                  | 1 DAI      | cylindrical (49/50)   | 3.00 $\pm$ 0.21 (17)                         | 1 <sup>st</sup> order (46/50)                      | na                        | na                 |
| 4                  | 2 DAI      | oval (42/50)          | 8.86 $\pm$ 0.65 (14)                         | 1 <sup>st</sup> order (44/50)                      | na                        | na                 |
| 5                  | 3 DAI      | oval (50/50)          | 17.94 $\pm$ 1.00 (12)                        | 2 <sup>nd</sup> order 1 <sup>st</sup> loop (41/50) | 0/70                      | na                 |
| 6                  | 4 DAI      | oval (50/50)          | 63.22 $\pm$ 5.85 (10)                        | 2 <sup>nd</sup> order 2 <sup>nd</sup> loop (36/50) | 0/70                      | 0/70               |
| 7                  | 5 DAI      | round (30/50)         | 349.99 $\pm$ 26.55 (17)                      | 2 <sup>nd</sup> order 2 <sup>nd</sup> loop (32/50) | 66/70                     | 0/70               |
| 8                  | 6 DAI      | round (38/50)         | 978.11 $\pm$ 97.41 (14)                      | 2 <sup>nd</sup> order 3 <sup>rd</sup> loop (34/50) | 70/70                     | 55/70              |
| <b>Condition B</b> |            |                       |                                              |                                                    |                           |                    |
| 2                  | 0 DAI      | semispherical (50/50) | 0.80 $\pm$ 0.00 (10)                         | none (50/50)                                       | na                        | na                 |
| 3                  | 1 DAI      | cylindrical (50/50)   | 3.67 $\pm$ 0.12 (16)                         | 1 <sup>st</sup> order (48/50)                      | na                        | na                 |
| 4                  | 2 DAI      | oval (37/50)          | 8.52 $\pm$ 0.78 (14)                         | 1 <sup>st</sup> order (40/50)                      | na                        | na                 |
| 5                  | 3 DAI      | oval (46/50)          | 19.34 $\pm$ 2.38 (12)                        | 2 <sup>nd</sup> order 1 <sup>st</sup> loop (50/50) | 0/70                      | na                 |
| 6                  | 4 DAI      | oval (50/50)          | 96.65 $\pm$ 7.09 (15)                        | 2 <sup>nd</sup> order 2 <sup>nd</sup> loop (35/50) | 66/70                     | 4/70               |
| 7                  | 5 DAI      | round (36/50)         | 308.63 $\pm$ 35.20 (16)                      | 2 <sup>nd</sup> order 2 <sup>nd</sup> loop (27/50) | 70/70                     | 62/70              |
| 8                  | 6 DAI      | round (42/50)         | 978.11 $\pm$ 107.93 (14)                     | 2 <sup>nd</sup> order 3 <sup>rd</sup> loop (42/50) | 70/70                     | 70/70              |
| <b>Condition C</b> |            |                       |                                              |                                                    |                           |                    |
| 2                  | na         | na                    | na                                           | na                                                 | na                        | na                 |
| 3                  | 0 DAI      | semispherical (44/50) | 0.98 $\pm$ 0.01 (18)                         | none (50/50)                                       | na                        | na                 |
| 4                  | 1 DAI      | cylindrical (50/50)   | 2.65 $\pm$ 0.01 (20)                         | primary (47/50)                                    | na                        | na                 |
| 5                  | 2 DAI      | oval (42/50)          | 9.32 $\pm$ 0.67 (12)                         | primary (33/50)                                    | na                        | na                 |
| 6                  | 3 DAI      | oval (50/50)          | 18.63 $\pm$ 1.07 (14)                        | secondary 1 <sup>st</sup> loop (39/50)             | 21/70                     | na                 |
| 7                  | 4 DAI      | oval (40/50)          | 56.86 $\pm$ 3.09 (14)                        | secondary 2 <sup>nd</sup> loop (35/50)             | 68/70                     | 33/70              |
| 8                  | 5 DAI      | round (42/50)         | 147.84 $\pm$ 12.60 (12)                      | secondary 2 <sup>nd</sup> loop (38/50)             | 70/70                     | 70/70              |

Growth condition-dependent morphology of leaves evaluated by shape (defining DAI relative to DAG), size (determined from digital images using Image J 1.30 software), procambial status (referring to formation of particular procambial strands) and mesophyll differentiation (referring to the presence of mesophyll in particular IAs). Leaf size values as mean $\pm$ s.e.m; number of samples is in parentheses. Other values in parentheses refer to the fraction of primordia displaying a particular feature. All observations are based on whole-mount preparations of Athb8-GUS-stained first leaves grown under the indicated conditions. Note that except for mesophyll differentiation, leaf development proceeds very similarly under all conditions between 0 DAI and 4 DAI, the phase critical for procambium formation. na, not applicable.
